# Supplementary material for: Pluralistic and stochastic gene regulation: examples, models and consistent theory
Source: PubMed Central journal article supplement — Nucleic Acids Res. 2016 Jan 28;44(10):4595–609. doi: 10.1093/nar/gkw042 (PMC4889914; doi:10.1093/nar/gkw042), 2016-01-28
Supplement: supp_gkw042_nar-02590-n-2015-File013.pdf [file supp_gkw042_nar-02590-n-2015-File013.pdf]

**Table S1. Genes coding for functional cytoplasmic and mitochondrial proteins (A) in the human genome, and (B) in the mouse genome.**

|               | <b>human cRPGs</b> |
|---------------|--------------------|
| <i>Symbol</i> | <i>Accession</i>   |
| RPSAP58       | ENSG00000205246    |
| RPSA          | ENSG00000168028    |
| RPS9          | ENSG00000170889    |
| RPS8          | ENSG00000142937    |
| RPS7          | ENSG00000171863    |
| RPS6          | ENSG00000137154    |
| RPS5          | ENSG00000083845    |
| RPS4Y2        | ENSG00000157828    |
| RPS4Y1        | ENSG00000129824    |
| RPS4XP21      | ENSG00000186008    |
| RPS4X         | ENSG00000198034    |
| RPS3          | ENSG00000149273    |
| RPS3A         | ENSG00000145425    |
| RPS2          | ENSG00000140988    |
| RPS29         | ENSG00000213741    |
| RPS28         | ENSG00000233927    |
| RPS27L        | ENSG00000185088    |
| RPS27         | ENSG00000177954    |
| RPS27A        | ENSG00000143947    |
| RPS26         | ENSG00000197728    |
| RPS25         | ENSG00000118181    |
| RPS24         | ENSG00000138326    |
| RPS23         | ENSG00000186468    |
| RPS21         | ENSG00000171858    |
| RPS20         | ENSG00000008988    |
| RPS19         | ENSG00000105372    |
| RPS18         | ENSG00000231500    |
| RPS17L        | ENSG00000182774    |
| RPS17         | ENSG00000184779    |
| RPS16         | ENSG00000105193    |
| RPS15         | ENSG00000115268    |
| RPS15A        | ENSG00000134419    |
| RPS14         | ENSG00000164587    |

|         |                 |
|---------|-----------------|
| RPS13   | ENSG00000110700 |
| RPS12   | ENSG00000112306 |
| RPS11   | ENSG00000142534 |
| RPS10   | ENSG00000124614 |
| RPLP2   | ENSG00000177600 |
| RPLP1   | ENSG00000137818 |
| RPLP0   | ENSG00000089157 |
| RPL9    | ENSG00000163682 |
| RPL8    | ENSG00000161016 |
| RPL7L1  | ENSG00000146223 |
| RPL7    | ENSG00000147604 |
| RPL7A   | ENSG00000148303 |
| RPL6    | ENSG00000089009 |
| RPL5    | ENSG00000122406 |
| RPL4    | ENSG00000174444 |
| RPL41   | ENSG00000229117 |
| RPL3L   | ENSG00000140986 |
| RPL3    | ENSG00000100316 |
| RPL39L  | ENSG00000163923 |
| RPL39   | ENSG00000198918 |
| RPL38   | ENSG00000172809 |
| RPL37   | ENSG00000145592 |
| RPL37A  | ENSG00000197756 |
| RPL36   | ENSG00000130255 |
| RPL36AL | ENSG00000165502 |
| RPL36A  | ENSG00000241343 |
| RPL35   | ENSG00000136942 |
| RPL35A  | ENSG00000182899 |
| RPL34   | ENSG00000109475 |
| RPL32   | ENSG00000144713 |
| RPL31   | ENSG00000071082 |
| RPL30   | ENSG00000156482 |
| RPL29   | ENSG00000162244 |
| RPL28   | ENSG00000108107 |
| RPL27   | ENSG00000131469 |
| RPL27A  | ENSG00000166441 |
| RPL26L1 | ENSG00000037241 |
| RPL26   | ENSG00000161970 |
| RPL24   | ENSG00000114391 |
| RPL23   | ENSG00000125691 |
| RPL23A  | ENSG00000198242 |
| RPL22L1 | ENSG00000163584 |

|        |                 |
|--------|-----------------|
| RPL22  | ENSG00000116251 |
| RPL21  | ENSG00000122026 |
| RPL19  | ENSG00000108298 |
| RPL18  | ENSG00000063177 |
| RPL18A | ENSG00000105640 |
| RPL17  | ENSG00000265681 |
| RPL17  | ENSG00000215472 |
| RPL15  | ENSG00000174748 |
| RPL14  | ENSG00000188846 |
| RPL13  | ENSG00000167526 |
| RPL13A | ENSG00000142541 |
| RPL12  | ENSG00000197958 |
| RPL11  | ENSG00000142676 |
| RPL10L | ENSG00000165496 |
| RPL10  | ENSG00000147403 |
| RPL10A | ENSG00000198755 |

#### **human A147mRPGS**

*Symbol*      *Accession*

|         |                 |
|---------|-----------------|
| MRPS9   | ENSG00000135972 |
| MRPS7   | ENSG00000125445 |
| MRPS6   | ENSG00000243927 |
| MRPS5   | ENSG00000144029 |
| MRPS36  | ENSG00000134056 |
| MRPS35  | ENSG00000061794 |
| MRPS34  | ENSG00000074071 |
| MRPS33  | ENSG00000090263 |
| MRPS31  | ENSG00000102738 |
| MRPS30  | ENSG00000112996 |
| MRPS2   | ENSG00000122140 |
| MRPS28  | ENSG00000147586 |
| MRPS27  | ENSG00000113048 |
| MRPS26  | ENSG00000125901 |
| MRPS25  | ENSG00000131368 |
| MRPS24  | ENSG00000062582 |
| MRPS23  | ENSG00000181610 |
| MRPS22  | ENSG00000175110 |
| MRPS18C | ENSG00000163319 |
| MRPS18B | ENSG00000204568 |
| MRPS18A | ENSG00000096080 |
| MRPS17  | ENSG00000239789 |

|        |                 |
|--------|-----------------|
| MRPS16 | ENSG00000182180 |
| MRPS15 | ENSG00000116898 |
| MRPS14 | ENSG00000120333 |
| MRPS12 | ENSG00000128626 |
| MRPS11 | ENSG00000181991 |
| MRPS10 | ENSG00000048544 |
| MRPL9  | ENSG00000143436 |
| MRPL55 | ENSG00000162910 |
| MRPL54 | ENSG00000183617 |
| MRPL53 | ENSG00000204822 |
| MRPL52 | ENSG00000172590 |
| MRPL51 | ENSG00000111639 |
| MRPL50 | ENSG00000136897 |
| MRPL4  | ENSG00000105364 |
| MRPL49 | ENSG00000149792 |
| MRPL48 | ENSG00000175581 |
| MRPL47 | ENSG00000136522 |
| MRPL46 | ENSG00000259494 |
| MRPL45 | ENSG00000174100 |
| MRPL44 | ENSG00000135900 |
| MRPL43 | ENSG00000055950 |
| MRPL42 | ENSG00000198015 |
| MRPL41 | ENSG00000182154 |
| MRPL40 | ENSG00000185608 |
| MRPL3  | ENSG00000114686 |
| MRPL39 | ENSG00000154719 |
| MRPL38 | ENSG00000204316 |
| MRPL37 | ENSG00000116221 |
| MRPL36 | ENSG00000171421 |
| MRPL35 | ENSG00000132313 |
| MRPL34 | ENSG00000130312 |
| MRPL33 | ENSG00000243147 |
| MRPL32 | ENSG00000106591 |
| MRPL30 | ENSG00000185414 |
| MRPL2  | ENSG00000112651 |
| MRPL28 | ENSG00000086504 |
| MRPL27 | ENSG00000108826 |
| MRPL24 | ENSG00000143314 |
| MRPL23 | ENSG00000214026 |
| MRPL22 | ENSG00000082515 |
| MRPL21 | ENSG00000197345 |
| MRPL20 | ENSG00000242485 |

|        |                 |
|--------|-----------------|
| MRPL1  | ENSG00000169288 |
| MRPL19 | ENSG00000115364 |
| MRPL18 | ENSG00000112110 |
| MRPL17 | ENSG00000158042 |
| MRPL16 | ENSG00000166902 |
| MRPL15 | ENSG00000137547 |
| MRPL14 | ENSG00000180992 |
| MRPL13 | ENSG00000172172 |
| MRPL12 | ENSG00000262814 |
| MRPL11 | ENSG00000174547 |
| MRPL10 | ENSG00000159111 |
| MRP63  | ENSG00000173141 |

**mouse cRPGs+A231**

|         |                    |
|---------|--------------------|
| RPL10   | ENSMUSG00000008682 |
| RPL10A  | ENSMUSG00000037805 |
| RPL10L  | ENSMUSG00000060499 |
| RPL11   | ENSMUSG00000059291 |
| RPL12   | ENSMUSG00000038900 |
| RPL13   | ENSMUSG00000000740 |
| RPL13A  | ENSMUSG00000074129 |
| RPL14   | ENSMUSG00000025794 |
| RPL15   | ENSMUSG00000012405 |
| RPL17   | ENSMUSG00000062328 |
| RPL18   | ENSMUSG00000059070 |
| RPL18A  | ENSMUSG00000045128 |
| RPL19   | ENSMUSG00000017404 |
| RPL21   | ENSMUSG00000041453 |
| RPL22   | ENSMUSG00000028936 |
| RPL22L1 | ENSMUSG00000039221 |
| RPL23   | ENSMUSG00000071415 |
| RPL23A  | ENSMUSG00000058546 |
| RPL26   | ENSMUSG00000060938 |
| RPL27   | ENSMUSG00000063316 |
| RPL27A  | ENSMUSG00000046364 |
| RPL28   | ENSMUSG00000030432 |
| RPL29   | ENSMUSG00000048758 |
| RPL3    | ENSMUSG00000060036 |
| RPL30   | ENSMUSG00000058600 |
| RPL31   | ENSMUSG00000073702 |
| RPL32   | ENSMUSG00000057841 |
| RPL34   | ENSMUSG00000062006 |

|          |                    |
|----------|--------------------|
| RPL35    | ENSMUSG00000062997 |
| RPL35A   | ENSMUSG00000060636 |
| RPL36    | ENSMUSG00000057863 |
| RPL36A   | ENSMUSG00000079435 |
| RPL36AL  | ENSMUSG00000049751 |
| RPL37    | ENSMUSG00000041841 |
| RPL37A   | ENSMUSG00000046330 |
| RPL38    | ENSMUSG00000057322 |
| RPL39    | ENSMUSG00000079641 |
| RPL39L   | ENSMUSG00000039209 |
| RPL3L    | ENSMUSG00000002500 |
| RPL4     | ENSMUSG00000032399 |
| RPL5     | ENSMUSG00000058558 |
| RPL6     | ENSMUSG00000029614 |
| RPL7     | ENSMUSG00000043716 |
| RPL7A    | ENSMUSG00000062647 |
| RPL7L1   | ENSMUSG00000063888 |
| RPL8     | ENSMUSG00000003970 |
| RPL9     | ENSMUSG00000047215 |
| RPLP0    | ENSMUSG00000067274 |
| RPLP1    | ENSMUSG00000007892 |
| RPLP2    | ENSMUSG00000025508 |
| RPS10    | ENSMUSG00000052146 |
| RPS11    | ENSMUSG00000003429 |
| RPS12    | ENSMUSG00000061983 |
| RPS13    | ENSMUSG00000090862 |
| RPS14    | ENSMUSG00000024608 |
| RPS15    | ENSMUSG00000063457 |
| RPS15A   | ENSMUSG00000008683 |
| RPS16    | ENSMUSG00000037563 |
| RPS17    | ENSMUSG00000061787 |
| RPS18    | ENSMUSG00000008668 |
| RPS19    | ENSMUSG00000040952 |
| RPS19BP1 | ENSMUSG00000051518 |
| RPS2     | ENSMUSG00000044533 |
| RPS20    | ENSMUSG00000028234 |
| RPS21    | ENSMUSG00000039001 |
| RPS23    | ENSMUSG00000049517 |
| RPS24    | ENSMUSG00000025290 |
| RPS25    | ENSMUSG00000009927 |
| RPS26    | ENSMUSG00000025362 |
| RPS27    | ENSMUSG00000090733 |

|        |                    |
|--------|--------------------|
| RPS27A | ENSMUSG00000020460 |
| RPS27L | ENSMUSG00000036781 |
| RPS28  | ENSMUSG00000067288 |
| RPS29  | ENSMUSG00000034892 |
| RPS3   | ENSMUSG00000030744 |
| RPS3A  | ENSMUSG00000028081 |
| RPS4X  | ENSMUSG00000031320 |
| RPS4Y2 | ENSMUSG00000063171 |
| RPS5   | ENSMUSG00000012848 |
| RPS6   | ENSMUSG00000028495 |
| RPS7   | ENSMUSG00000061477 |
| RPS8   | ENSMUSG00000047675 |
| RPS9   | ENSMUSG00000006333 |
| RPSA   | ENSMUSG00000032518 |

**mouse mRPGs**

|        |                    |
|--------|--------------------|
| MRPL1  | ENSMUSG00000029486 |
| MRPL10 | ENSMUSG00000001445 |
| MRPL11 | ENSMUSG00000024902 |
| MRPL12 | ENSMUSG00000039640 |
| MRPL13 | ENSMUSG00000022370 |
| MRPL14 | ENSMUSG00000023939 |
| MRPL15 | ENSMUSG00000033845 |
| MRPL16 | ENSMUSG00000024683 |
| MRPL17 | ENSMUSG00000030879 |
| MRPL18 | ENSMUSG00000057388 |
| MRPL19 | ENSMUSG00000030045 |
| MRPL2  | ENSMUSG00000002767 |
| MRPL20 | ENSMUSG00000029066 |
| MRPL21 | ENSMUSG00000024829 |
| MRPL22 | ENSMUSG00000020514 |
| MRPL23 | ENSMUSG00000037772 |
| MRPL24 | ENSMUSG00000019710 |
| MRPL27 | ENSMUSG00000024414 |
| MRPL28 | ENSMUSG00000024181 |
| MRPL3  | ENSMUSG00000032563 |
| MRPL30 | ENSMUSG00000026087 |
| MRPL32 | ENSMUSG00000015672 |
| MRPL33 | ENSMUSG00000029142 |
| MRPL34 | ENSMUSG00000034880 |
| MRPL35 | ENSMUSG00000052962 |
| MRPL36 | ENSMUSG00000021607 |

|         |                    |
|---------|--------------------|
| MRPL37  | ENSMUSG00000028622 |
| MRPL38  | ENSMUSG00000020775 |
| MRPL39  | ENSMUSG00000022889 |
| MRPL4   | ENSMUSG00000003299 |
| MRPL40  | ENSMUSG00000022706 |
| MRPL41  | ENSMUSG00000036850 |
| MRPL42  | ENSMUSG00000062981 |
| MRPL43  | ENSMUSG00000025208 |
| MRPL44  | ENSMUSG00000026248 |
| MRPL45  | ENSMUSG00000018882 |
| MRPL46  | ENSMUSG00000030612 |
| MRPL47  | ENSMUSG00000037531 |
| MRPL48  | ENSMUSG00000030706 |
| MRPL49  | ENSMUSG00000007338 |
| MRPL50  | ENSMUSG00000044018 |
| MRPL51  | ENSMUSG00000030335 |
| MRPL52  | ENSMUSG00000010406 |
| MRPL53  | ENSMUSG00000030037 |
| MRPL54  | ENSMUSG00000034932 |
| MRPL55  | ENSMUSG00000036860 |
| MRPL9   | ENSMUSG00000028140 |
| MRPS10  | ENSMUSG00000034729 |
| MRPS11  | ENSMUSG00000030611 |
| MRPS12  | ENSMUSG00000045948 |
| MRPS14  | ENSMUSG00000058267 |
| MRPS15  | ENSMUSG00000028861 |
| MRPS16  | ENSMUSG00000049960 |
| MRPS17  | ENSMUSG00000034211 |
| MRPS18A | ENSMUSG00000023967 |
| MRPS18B | ENSMUSG00000024436 |
| MRPS18C | ENSMUSG00000016833 |
| MRPS2   | ENSMUSG00000035772 |
| MRPS21  | ENSMUSG00000054312 |
| MRPS22  | ENSMUSG00000032459 |
| MRPS23  | ENSMUSG00000023723 |
| MRPS24  | ENSMUSG00000020477 |
| MRPS25  | ENSMUSG00000014551 |
| MRPS26  | ENSMUSG00000037740 |
| MRPS27  | ENSMUSG00000041632 |
| MRPS28  | ENSMUSG00000040269 |
| MRPS30  | ENSMUSG00000021731 |
| MRPS31  | ENSMUSG00000031533 |



|        |                    |
|--------|--------------------|
| MRPS33 | ENSMUSG00000029918 |
| MRPS34 | ENSMUSG00000038880 |
| MRPS35 | ENSMUSG00000040112 |
| MRPS36 | ENSMUSG00000061474 |
| MRPS5  | ENSMUSG00000027374 |
| MRPS6  | ENSMUSG00000039680 |
| MRPS9  | ENSMUSG00000060679 |
